# Supplementary material for: A novel human S10F‐Hsp20 mutation induces lethal peripartum cardiomyopathy
Source: PubMed Central journal article supplement (PMC6050507; doi:10.1111/jcmm.13665), 2018-05-15
Supplement: JCMM-22-3911-s002.pdf [file JCMM-22-3911-s002.pdf]

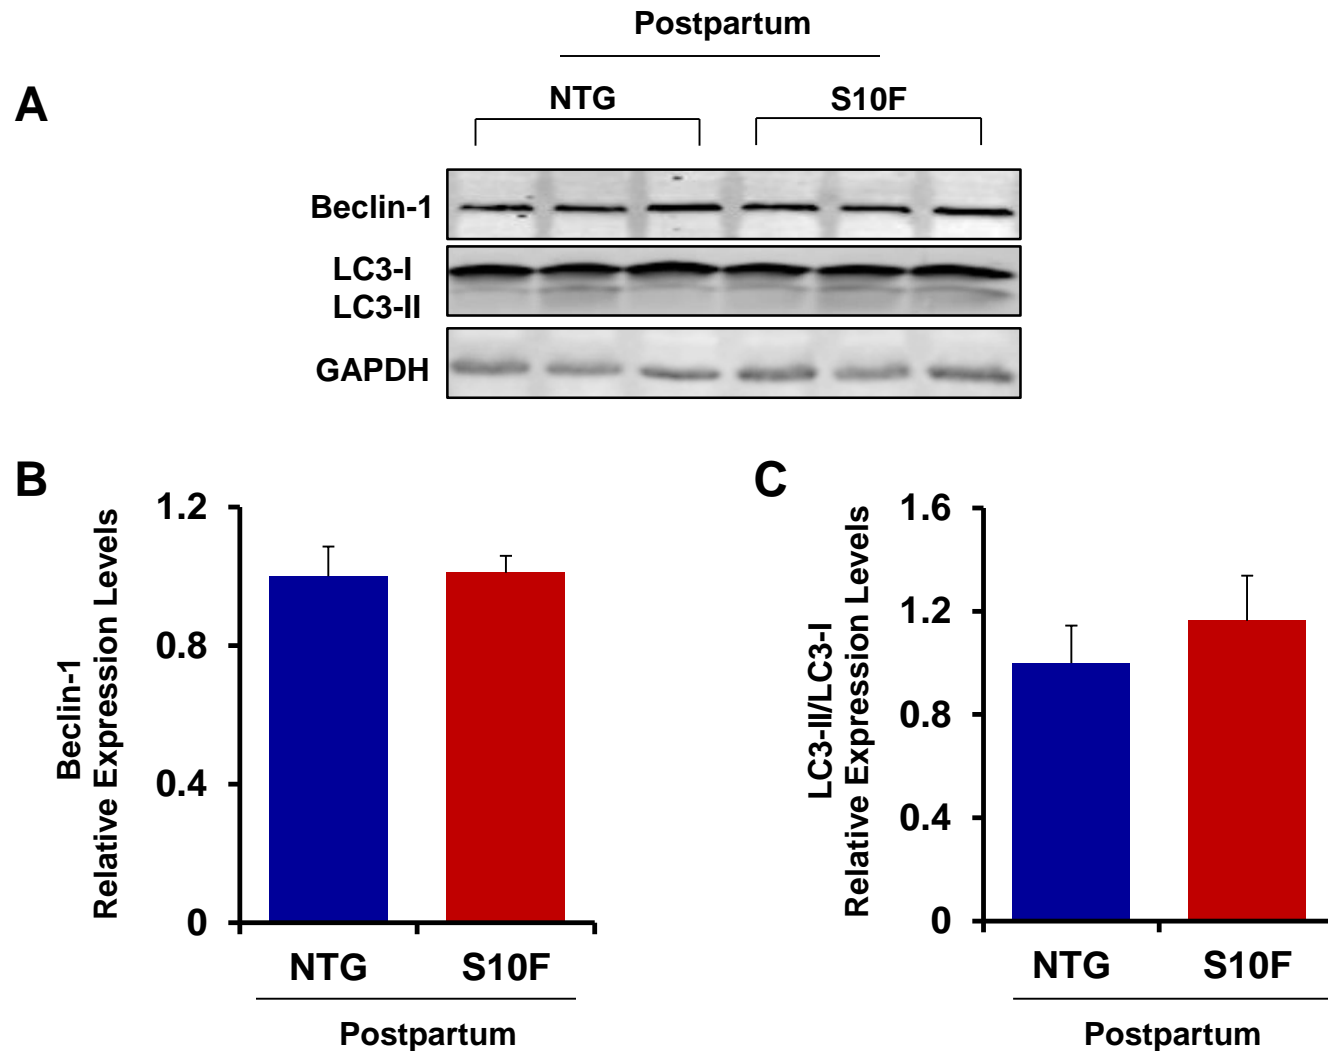

**Supplementary Figure 2. Protein levels of Beclin-1 and LC3-II/LC3-I were unaltered following three pregnancies in S10F-Hsp20 hearts.** (A) Representative western blots of Beclin-1 and LC3-II/LC3-I protein levels in NTG and S10F hearts following three pregnancies. (B) Quantitative analysis of Beclin-1 and LC3-II/LC3-I protein levels after normalization to the loading control, GAPDH. Values represent mean  $\pm$  SEM;  $n=3$  per group.
